# Supplementary material for: Checkpoint blockade accelerates a novel switch from an NKT-driven TNFα response toward a T cell driven IFN-γ response within the tumor microenvironment
Source: PubMed Central journal article supplement — J Immunother Cancer. 2021 Jun 16;9(6):e002269. doi: 10.1136/jitc-2020-002269 (PMC8211075; doi:10.1136/jitc-2020-002269), 2021-06-16
Supplement: jitc-2020-002269supp001.pdf [file jitc-2020-002269supp001.pdf]

## Supplementary Information

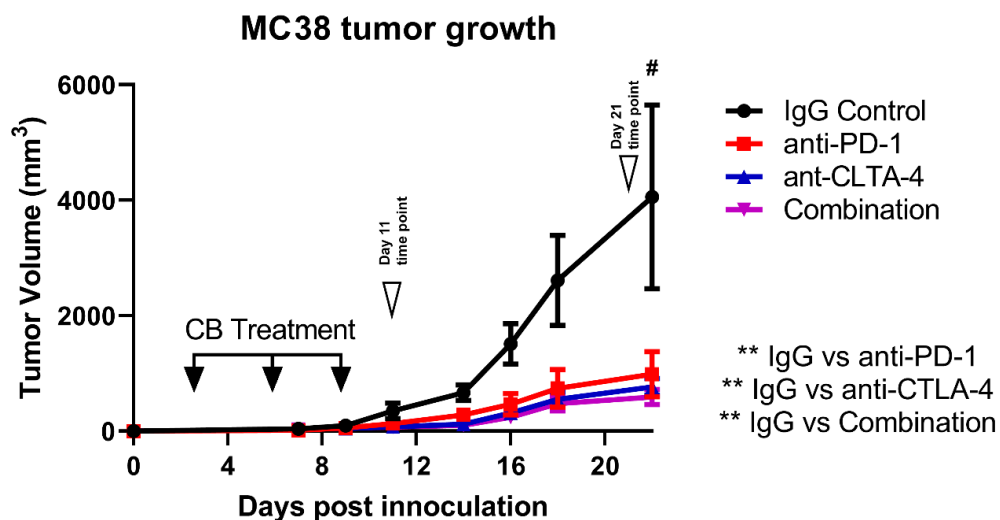

**Supplemental Figure 1: The effect of checkpoint blockade on MC38 tumor growth.** C57BL/6 mice were inoculated subcutaneously in the upper back with  $1.0 \times 10^6$  MC38 cells in sterile PBS (100  $\mu$ L) and were then treated with intraperitoneal injections with control IgG, anti-PD-1, anti-CTLA-4, or a combination of anti-PD-1 and anti-CTLA-4 antibodies on days 3, 6, and 9. Day 11 and day 21 time points are indicated and represent the time points used to investigate the tumor infiltrating lymphocyte (TIL) landscape. Growth curves were analyzed using area under the curve analysis (AUC). \*\*,  $p \leq 0.01$ .  $n=5$  for all groups, except for the IgG control timepoint at day 22 (#;  $n=4$ ).

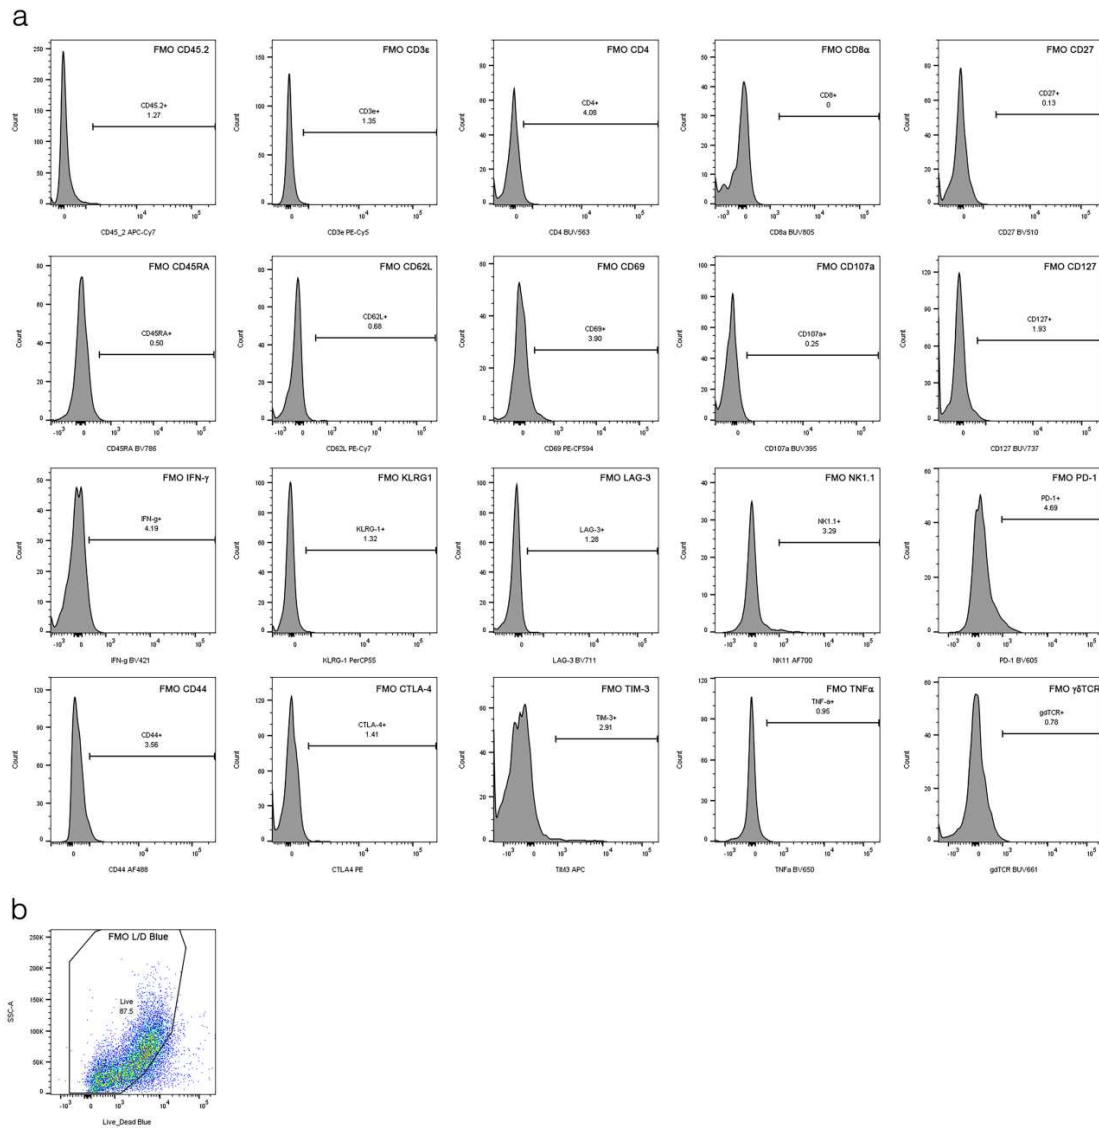

**Supplemental Figure 2: Fluorescence-minus-one (FMO) control samples.** (a) Small aliquots from each tumor digest were pooled and then stained for all fluorescent parameters except for one as indicated. Cells were first gated on non-aggregates, and then on viable cells before plotting the respective histograms. (b) FMO for Live/Dead Fixable Blue viability dye. Here cells were only gated on non-aggregates prior to plotting side-scatter area parameter versus the channel used for the detection of Live/Dead Fixable Blue.

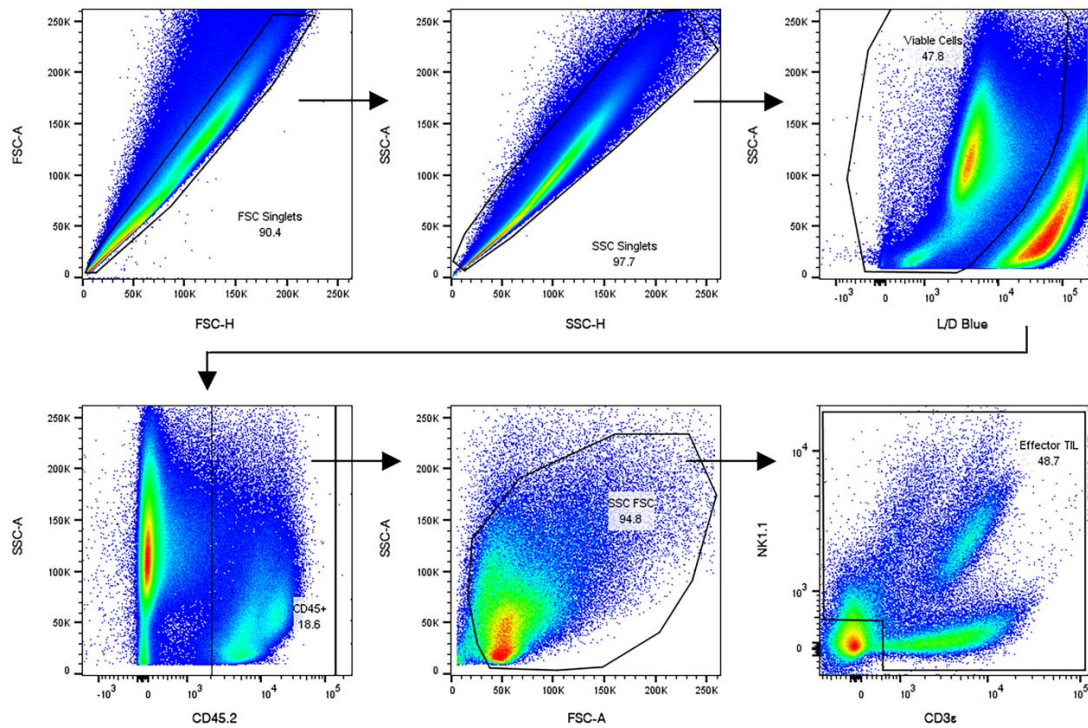

**Supplemental Figure 3: Preliminary gating schema.** Prior to t-SNE analysis, concatenated data was first gated on non-aggregate events using forward scatter area (FSC-A) versus height (FSC-H) parameters, and then by using side scatter area (SSC-A) versus height (SSC-H) parameters, followed by Live/Dead Fixable Blue-excluding events for viability, followed by SSC-A versus FSC-A parameters to exclude debris, followed by CD3 $\epsilon$  and/or NK1.1 positivity.

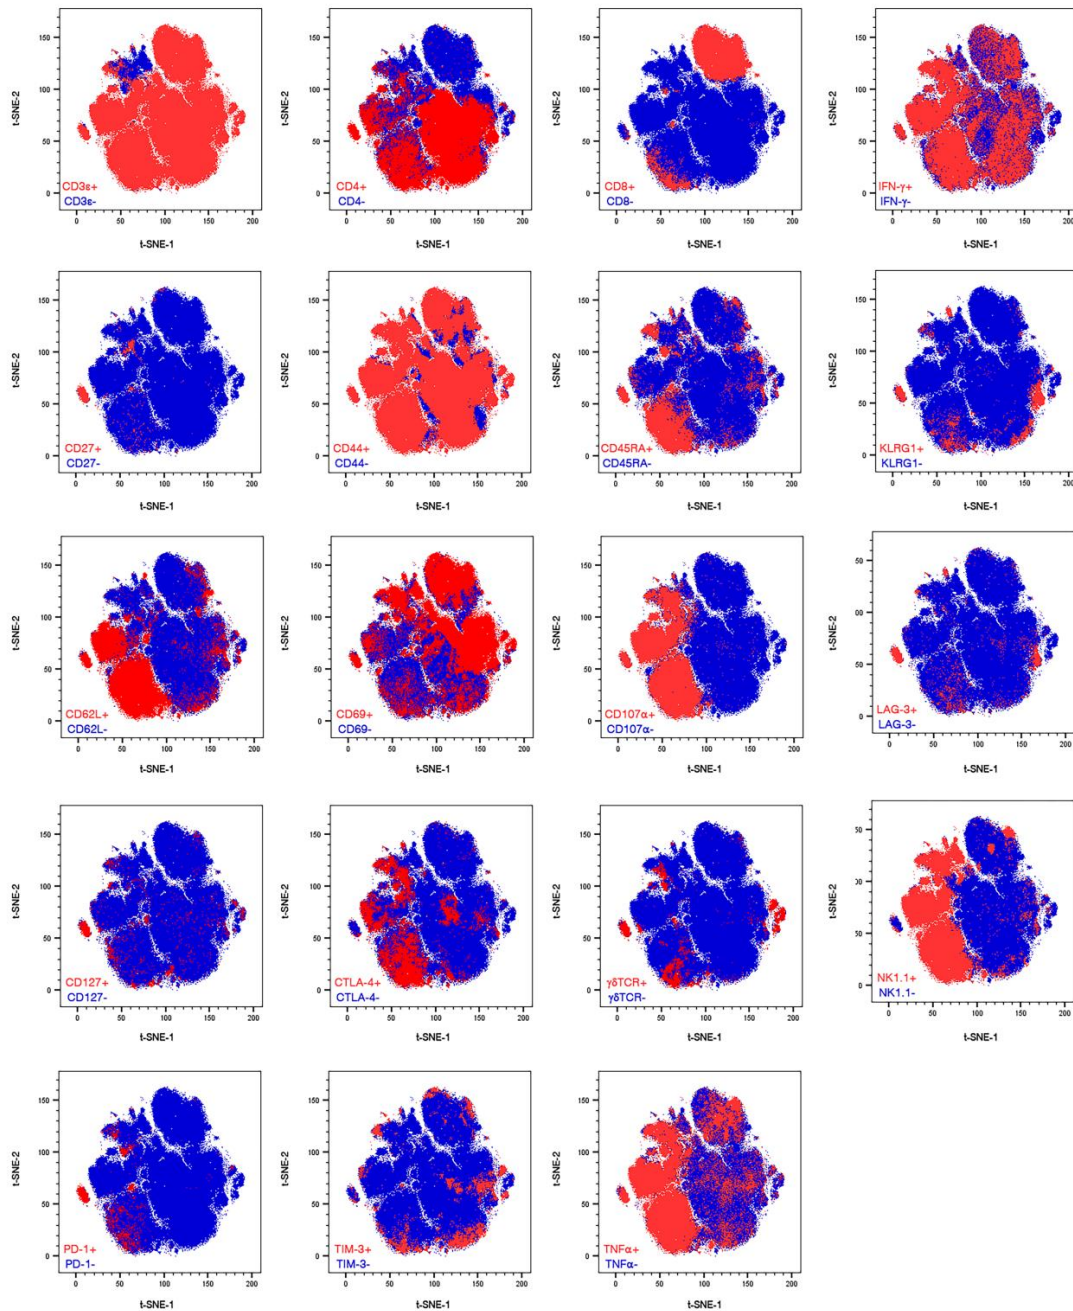

**Supplemental Figure 4: t-SNE positive event overlays as determined by FMO controls.** Positive and negative events for each indicated parameter were selected using the gates defined by FMO controls as in Supplemental Figure 2, and then overlaid on dot plots of t-SNE parameters. Note that positive events (red) are on top of negative events (blue), and not interspersed.

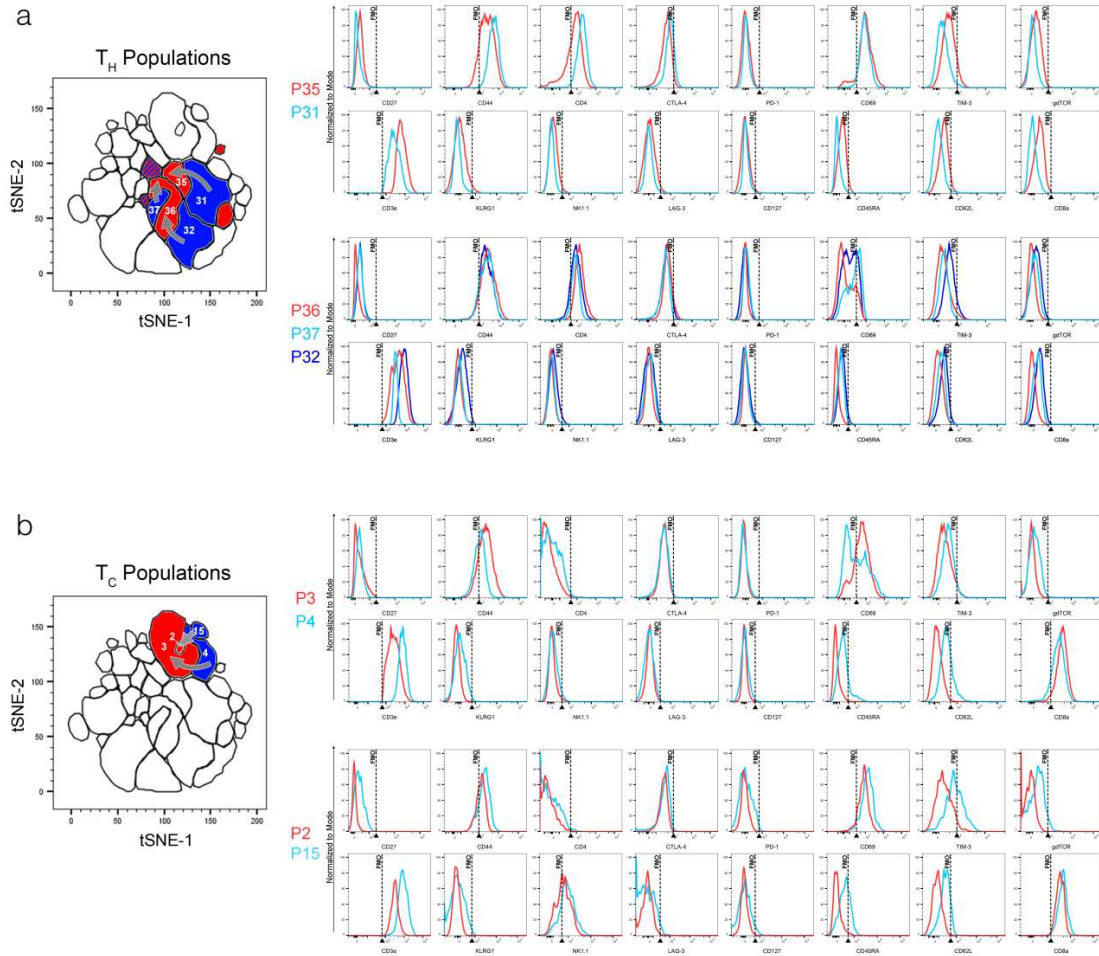

**Supplemental Figure 5: Analogous T cell populations found in TIL isolated from day 11 and day 21 MC38 tumors.** (a-b) T<sub>H</sub> cell populations (a), and T<sub>C</sub> populations (b) depicted on the t-SNE map on the left highlighted in blue represent associations with the day 11 time point, while those highlighted in red represent associations with the day 21 time point. Striped populations were found in both time points. Grey arrows indicate analogous populations closely related to each other from different time points as defined by the hierarchical clustering demonstrated in Figure 1e. Histograms of all clustering parameters are depicted on the right for each set of analogous populations. The MFI at which each FMO gate was set in Supplementary Figure 1 is depicted with a dashed black line.

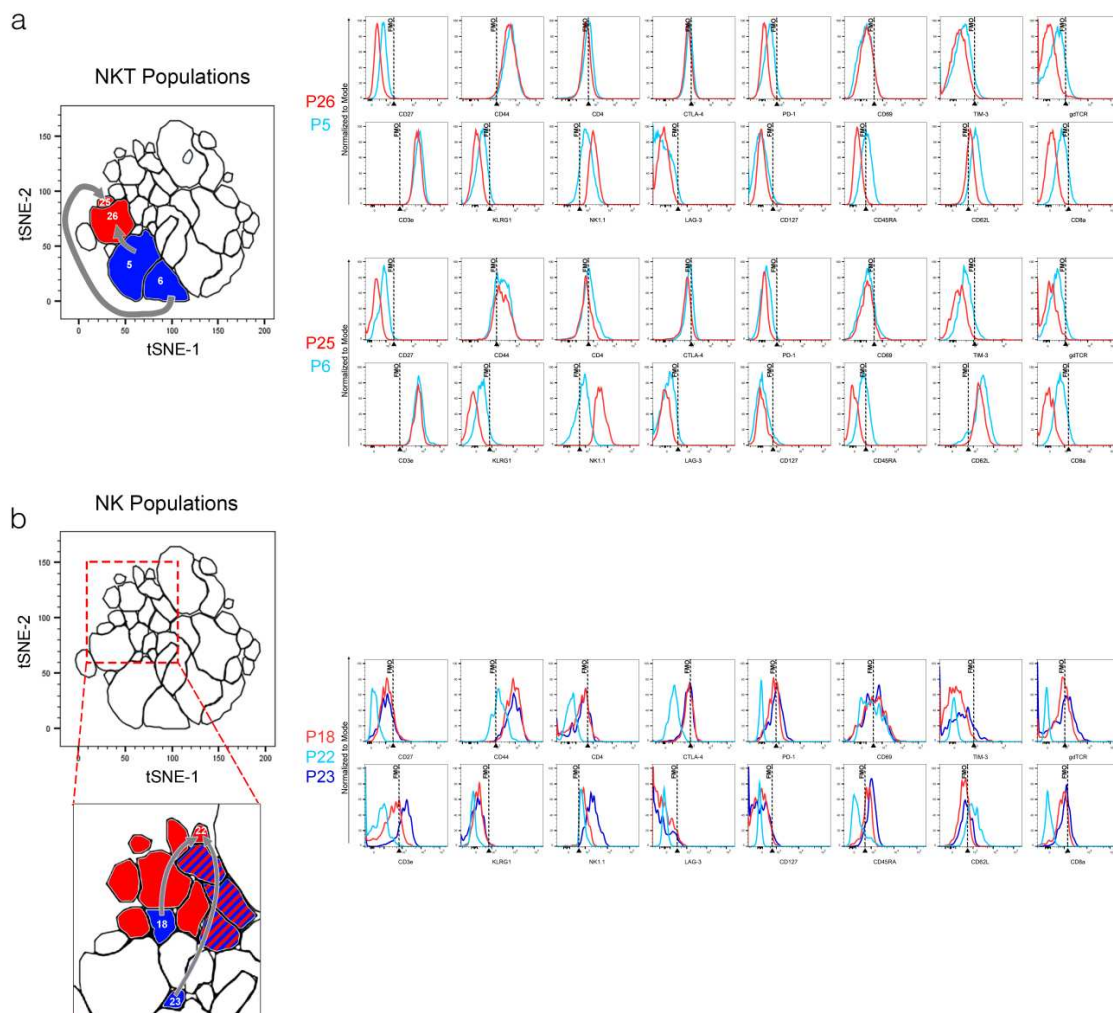

**Supplemental Figure 6: Analogous NKT and NK cell populations found in TIL isolated from day 11 and day 21 MC38 tumors.** (a-b) NKT cell populations (a), and NK populations (b) depicted on the t-SNE map on the left highlighted in blue represent associations with the day 11 time point, while those highlighted in red represent associations with the day 21 time point. Stripped populations were found in both time points. Grey arrows indicate analogous populations closely related to each other from different time points as defined by the hierarchical clustering demonstrated in Figure 1e. Histograms of all clustering parameters are depicted on the right for each set of analogous populations. The MFI at which each FMO gate was set in Supplementary Figure 1 is depicted with a dashed black line.

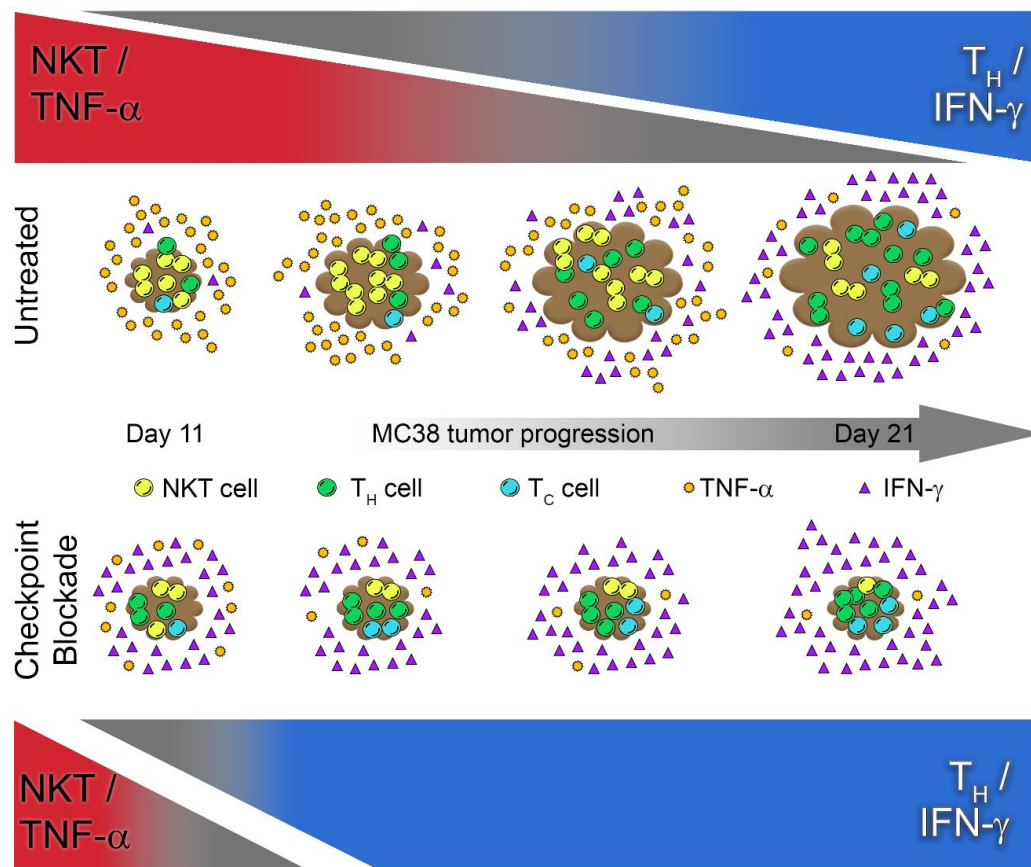

**Supplemental Figure 7: A summary schematic of the proposed NKT/TNF- $\alpha$  to T<sub>H</sub>/IFN- $\gamma$  switch.** In untreated mice, the anti-tumor immune response is dominated by NKT cells and TNF- $\alpha$  production during early tumor growth as measured 11 days following inoculation. This response subsides and is surpassed by conventional T cell (and in particular T<sub>H</sub> cell) responses and IFN- $\gamma$  production in later tumor growth as measured 21 days following inoculation. In mice treated with checkpoint blockade, this switch occurs more quickly with significantly greater frequencies of T<sub>H</sub> cells and IFN- $\gamma$  production already set in place at day 11 post inoculation.

| Supplemental Table 1: Antibody Information |             |                  |                |           |              |      |       |
|--------------------------------------------|-------------|------------------|----------------|-----------|--------------|------|-------|
| Antigen                                    | Conjugation | Channel          | Vendor         | Cat       | Clone        | μl*  | Use** |
| CD3ε                                       | PE-Cy5      | YG-C 670/30      | BD Biosciences | 553065    | 145-2C11     | 2.5  | PG, C |
| CD4                                        | BUV563      | UV-E 586/15      | BD Biosciences | 565709    | GK1.5        | 5    | C     |
| CD8a                                       | BUV805      | UV-A 820/60      | BD Biosciences | 564920    | 53-6.7       | 1.25 | C     |
| CD69                                       | PE-CF594    | YG-D 610/20      | BD Biosciences | 562455    | H1.2F3       | 1    | C     |
| CD62L                                      | PE-Cy7      | YG-A 780/60      | Biologend      | 104418    | MEL-14       | 0.5  | C     |
| CD27                                       | BV510       | Violet -F 525/50 | BD Biosciences | 563605    | LG.3A10      | 5    | C     |
| CD45RA                                     | BV786       | Violet-A 780/60  | BD Biosciences | 564361    | 14.8         | 1    | C     |
| CD44                                       | AF488       | Blue-E 530/30    | Biologend      | 103016    | IM7          | 0.5  | C     |
| KLRG-1                                     | PerCP-Cy5.5 | Blue-B 710/50    | Biologend      | 138418    | 2F/KLRG1     | 0.5  | C     |
| CD45.2                                     | APC-Cy7     | Red-A 780/60     | Biologend      | 109824    | 104          | 1    | P     |
| PD-1                                       | BV605       | Violet-D 610/20  | BD Biosciences | 563059    | J43          | 0.5  | C     |
| LAG-3                                      | BV711       | Violet B- 710/50 | BD Biosciences | 563179    | C9B7W        | 0.5  | C     |
| TIM-3                                      | APC         | Red-C 670/30     | Biologend      | 119706    | RMT3-23      | 2    | C     |
| CTLA-4                                     | PE          | YG-E 586/15      | BD Biosciences | 553720    | UC10-4F10-11 | 2    | C     |
| CD127                                      | BUV737      | UV-B 740/35      | BD Biosciences | 564399    | SB/199       | 1    | C     |
| NK1.1                                      | AF700       | Red-B 710/50     | BD Biosciences | 560515    | PK136        | 10   | PG, C |
| CD107a                                     | BUV395      | UV-H 379/28      | BD Biosciences | 565533    | 1D4B         | 10   | E     |
| γδTCR                                      | BUV661      | UV-C 370/30      | BD Biosciences | 750766    | V65          | 5    | C     |
| INF-g                                      | BV421       | Violet G-450/50  | BD Biosciences | 563376    | XMG1.2       | 5    | E     |
| TNFα                                       | BV650       | Violet-C 670/30  | BD Biosciences | 563943    | MP6-XT22     | 5    | E     |
| L/D Fix Blue                               |             | UV-G 450/50      | Invitrogen     | L23105    | N/A          | 1    | PG    |
| α-GalCer tet.                              | PE          | YG-E 586/15      | ProImmune      | E001-2A-D | N/A          | 2    | S     |

#### Supplemental Table 1: Flow cytometry antibodies

\*Optimal μl antibody/dye used per 100 μl staining volume per 1x10<sup>6</sup> cells as determined by staining index titration.

\*\* PG = preliminary gating; C = clustering; E = effector function; S = supplementary panel



| Supplementary Table 2: Comparisons of t-SNE Population Frequencies after Treatment with Checkpoint Blockade |             |                     |                      |                      |                     |                     |                      |                     |
|-------------------------------------------------------------------------------------------------------------|-------------|---------------------|----------------------|----------------------|---------------------|---------------------|----------------------|---------------------|
| Population                                                                                                  | Day 11      |                     |                      |                      | Day 21              |                     |                      |                     |
|                                                                                                             | Iso Tx      | $\alpha$ -PD1       | $\alpha$ -CTLA4      | Combo                | Iso Tx              | $\alpha$ -PD1       | $\alpha$ -CTLA4      | Combo               |
| 1                                                                                                           | 0.31 ± 0.12 | 0.69 ± 0.26         | <b>3.8 ± 1.5**</b>   | <b>3.6 ± 1.2**</b>   | <b>0.03 ± 0.01*</b> | 0.27 ± 0.22         | 0.12 ± 0.07          | 0.32 ± 0.22         |
| 2                                                                                                           | 0.21 ± 0.13 | 0.08 ± 0.02         | 0.10 ± 0.10          | 0.10 ± 0.00          | <b>2.6 ± 0.41*</b>  | <b>1.4 ± 0.67†</b>  | <b>0.62 ± 0.28†</b>  | <b>0.51 ± 0.20†</b> |
| 3                                                                                                           | 3.1 ± 0.38  | 2.7 ± 0.38          | 2.9 ± 0.36           | 2.4 ± 0.59           | <b>29 ± 0.32*</b>   | 25 ± 2.0            | 12 ± 2.8†            | 13 ± 2.5†           |
| 4                                                                                                           | 2.2 ± 0.52  | 4.0 ± 0.54          | <b>4.2 ± 0.44*</b>   | <b>4.5 ± 0.61*</b>   | 1.9 ± 0.08          | 2.4 ± 0.46          | <b>0.90 ± 0.23†</b>  | <b>0.72 ± 0.17†</b> |
| 5                                                                                                           | 46 ± 3.7    | 30 ± 4.3            | 26 ± 5.9             | <b>11 ± 3.9**</b>    | <b>0.22 ± 0.04*</b> | 0.18 ± 0.05         | 0.19 ± 0.04          | 0.23 ± 0.08         |
| 6                                                                                                           | 7.5 ± 1.1   | 8.2 ± 1.2           | 9.8 ± 1.5            | 8.8 ± 1.7            | <b>0.29 ± 0.12*</b> | 0.32 ± 0.09         | 0.16 ± 0.06          | 0.01 ± 0.01         |
| 7                                                                                                           | 0.70 ± 0.41 | 0.50 ± 0.15         | 0.42 ± 0.15          | 0.22 ± 0.10          | <b>0.01 ± 0.01*</b> | 0.00 ± 0.00         | 0.00 ± 0.00          | 0.00 ± 0.00         |
| 8                                                                                                           | 1.3 ± 0.16  | 2.3 ± 0.53          | 1.3 ± 0.23           | 1.3 ± 0.18           | 0.73 ± 0.18         | 1.3 ± 0.40          | 0.88 ± 0.10          | 0.76 ± 0.18         |
| 9                                                                                                           | 0.59 ± 0.16 | 1.1 ± 0.29          | 0.87 ± 0.17          | <b>1.4 ± 0.34*</b>   | <b>0.09 ± 0.02*</b> | <b>0.04 ± 0.01†</b> | 0.07 ± 0.03          | 0.08 ± 0.05         |
| 10                                                                                                          | 0.00 ± 0.00 | 0.00 ± 0.00         | 0.00 ± 0.00          | 0.00 ± 0.00          | <b>1.7 ± 0.19*</b>  | 2.4 ± 0.65          | 1.3 ± 0.29           | 2.9 ± 0.77          |
| 11                                                                                                          | 0.9 ± 0.28  | 0.91 ± 0.13         | 0.52 ± 0.15          | 0.65 ± 0.19          | <b>0.04 ± 0.00*</b> | 0.03 ± 0.02         | 0.03 ± 0.02          | 0.02 ± 0.02         |
| 12                                                                                                          | 0.02 ± 0.02 | 0.00 ± 0.00         | 0.00 ± 0.00          | 0.00 ± 0.00          | <b>2.4 ± 0.61*</b>  | 2.6 ± 0.61          | <b>0.61 ± 0.14††</b> | 0.62 ± 0.23         |
| 13                                                                                                          | 1.4 ± 0.24  | <b>0.50 ± 0.15*</b> | <b>0.33 ± 0.04**</b> | <b>0.14 ± 0.07**</b> | <b>3.5 ± 0.46*</b>  | 4.1 ± 0.58          | 2.5 ± 0.56           | 2.2 ± 0.72          |
| 14                                                                                                          | 0.42 ± 0.23 | 0.08 ± 0.02         | 0.08 ± 0.02          | 0.16 ± 0.08          | 0.85 ± 0.46         | 0.85 ± 0.38         | 0.80 ± 0.27          | 0.27 ± 0.08         |
| 15                                                                                                          | 0.75 ± 0.23 | 1.2 ± 0.28          | 1.3 ± 0.32           | 0.69 ± 0.28          | 0.34 ± 0.07         | <b>0.20 ± 0.01†</b> | <b>0.05 ± 0.02††</b> | <b>0.07 ± 0.06†</b> |
| 16                                                                                                          | 1.0 ± 0.10  | 0.82 ± 0.14         | 1.0 ± 0.19           | 0.89 ± 0.18          | <b>0.33 ± 0.1*</b>  | 0.23 ± 0.04         | 0.27 ± 0.06          | 0.52 ± 0.28         |
| 17                                                                                                          | 0.01 ± 0.07 | 0.08 ± 0.02         | 0.04 ± 0.02          | 0.09 ± 0.04          | <b>10 ± 2.6*</b>    | 9.4 ± 2.1           | <b>3.3 ± 1.9†</b>    | 5.1 ± 2.3           |
| 18                                                                                                          | 1.6 ± 0.28  | 1.9 ± 0.42          | 0.96 ± 0.18          | 0.83 ± 0.19          | <b>0.17 ± 0.04*</b> | 0.27 ± 0.07         | <b>0.05 ± 0.03†</b>  | 0.21 ± 0.06         |
| 19                                                                                                          | 1.4 ± 0.29  | 1.2 ± 0.19          | 0.87 ± 0.14          | 0.94 ± 0.11          | 0.57 ± 0.08         | 1.0 ± 0.22          | <b>1.0 ± 0.08†</b>   | 1.3 ± 0.29          |
| 20                                                                                                          | 2.1 ± 0.23  | 1.7 ± 0.18          | 1.8 ± 0.13           | 1.8 ± 0.21           | 3.0 ± 0.36          | <b>1.3 ± 0.20†</b>  | <b>1.5 ± 0.16††</b>  | 1.6 ± 0.32          |
| 21                                                                                                          | 0.30 ± 0.14 | 0.52 ± 0.13         | 0.35 ± 0.08          | 0.35 ± 0.11          | 0.54 ± 0.09         | 0.41 ± 0.08         | 0.30 ± 0.08          | 0.54 ± 0.15         |
| 22                                                                                                          | 0.09 ± 0.04 | 0.01 ± 0.01         | <b>0.00 ± 0.00*</b>  | <b>0.01 ± 0.00*</b>  | <b>0.34 ± 0.05*</b> | <b>0.64 ± 0.13†</b> | 0.23 ± 0.09          | 0.17 ± 0.06         |
| 23                                                                                                          | 0.86 ± 0.29 | 0.84 ± 0.19         | 0.42 ± 0.05          | 0.39 ± 0.10          | <b>0.00 ± 0.00*</b> | 0.01 ± 0.00         | 0.01 ± 0.01          | 0.00 ± 0.00         |
| 24                                                                                                          | 0.02 ± 0.02 | 0.05 ± 0.02         | 0.03 ± 0.01          | 0.01 ± 0.01          | <b>1.8 ± 0.34*</b>  | <b>0.57 ± 0.17†</b> | 1.6 ± 1.2            | 0.75 ± 0.41         |
| 25                                                                                                          | 0.04 ± 0.04 | 0.00 ± 0.00         | 0.01 ± 0.01          | 0.04 ± 0.04          | <b>1.2 ± 0.18*</b>  | 0.92 ± 0.22         | 1.6 ± 0.28           | 1.2 ± 0.36          |
| 26                                                                                                          | 0.96 ± 0.30 | 0.46 ± 0.10         | 0.35 ± 0.14          | <b>0.09 ± 0.04*</b>  | <b>14 ± 1.5*</b>    | 12 ± 1.8            | 29 ± 4.7             | 11 ± 1.7            |
| 27                                                                                                          | 0.64 ± 0.19 | 0.32 ± 0.09         | 0.48 ± 0.15          | <b>0.22 ± 0.06*</b>  | <b>5.2 ± 0.59*</b>  | <b>3.2 ± 0.29††</b> | 6.7 ± 1.3            | 3.0 ± 0.47          |
| 28                                                                                                          | 0.59 ± 0.16 | 0.68 ± 0.13         | 0.51 ± 0.12          | 0.70 ± 0.14          | 1.5 ± 0.24          | 2.1 ± 0.34          | <b>0.85 ± 0.12†</b>  | 2.5 ± 0.99          |
| 29                                                                                                          | 0.00 ± 0.00 | 0.01 ± 0.01         | 0.00 ± 0.00          | 0.03 ± 0.03          | <b>0.12 ± 0.04*</b> | 0.17 ± 0.06         | 0.10 ± 0.05          | 0.03 ± 0.02         |
| 30                                                                                                          | 0.07 ± 0.04 | 0.02 ± 0.01         | 0.04 ± 0.01          | 0.01 ± 0.01          | 0.07 ± 0.03         | 0.11 ± 0.04         | 0.83 ± 0.4           | 0.04 ± 0.03         |
| 31                                                                                                          | 9.2 ± 2.3   | 17 ± 2.6            | 14 ± 2.5             | <b>21 ± 3.1*</b>     | <b>2.5 ± 0.18*</b>  | 3.4 ± 0.32          | <b>3.5 ± 0.32†</b>   | 4.6 ± 0.91          |
| 32                                                                                                          | 5.0 ± 0.90  | <b>12 ± 1.3**</b>   | <b>18 ± 3.5**</b>    | <b>23 ± 2.4**</b>    | <b>0.79 ± 0.09*</b> | 1.0 ± 0.14          | 0.94 ± 0.15          | 0.87 ± 0.24         |
| 33                                                                                                          | 0.75 ± 0.26 | 0.81 ± 0.14         | <b>0.25 ± 0.09*</b>  | <b>0.26 ± 0.07*</b>  | 1.7 ± 0.30          | 2.3 ± 0.38          | 2.1 ± 0.36           | 2.2 ± 0.21          |
| 34                                                                                                          | 1.3 ± 0.14  | <b>3.1 ± 0.28**</b> | <b>3.6 ± 0.78**</b>  | <b>4.7 ± 0.78**</b>  | <b>0.12 ± 0.04*</b> | 0.07 ± 0.02         | 0.06 ± 0.02          | 0.24 ± 0.08         |
| 35                                                                                                          | 3.1 ± 0.90  | 1.3 ± 0.35          | <b>0.61 ± 0.11**</b> | <b>1.1 ± 0.23*</b>   | 2.8 ± 0.10          | 3.8 ± 0.45          | <b>8.4 ± 1.5††</b>   | <b>18 ± 4.0†</b>    |
| 36                                                                                                          | 2.9 ± 0.72  | 2.4 ± 0.50          | 1.6 ± 0.25           | 3.1 ± 0.47           | <b>8.7 ± 0.96*</b>  | <b>15 ± 2.4†</b>    | <b>15 ± 1.4††</b>    | <b>24 ± 2.9†</b>    |
| 37                                                                                                          | 2.6 ± 0.34  | 2.9 ± 0.31          | 2.8 ± 0.46           | <b>4.6 ± 0.57*</b>   | <b>0.61 ± 0.16*</b> | 0.68 ± 0.13         | <b>1.1 ± 0.13†</b>   | 0.83 ± 0.06         |

Supplemental Table 2. Mann Whitney U comparisons of t-SNE Population Frequencies after treatment with checkpoint blockade.

Iso = isotype control

\* p<0.05 versus Iso, Day 11

\*\* p<0.01 versus Iso, Day 11

\*\*\* p<0.001 versus Iso, Day 11

† p< 0.05 versus Iso, Day 21

†† p< 0.01 versus Iso, Day 21

††† p< 0.001 versus Iso, Day 21

| <b>Supplementary Table 3: Linear Regression Analyses of t-SNE Populations and Tumor Volume</b> |               |               |                 |               |               |                 |
|------------------------------------------------------------------------------------------------|---------------|---------------|-----------------|---------------|---------------|-----------------|
| Population                                                                                     | Day 11        |               |                 | Day 21        |               |                 |
|                                                                                                | P value       | R square      | Slope           | P value       | R square      | Slope           |
| 1                                                                                              | 0.2045        | 0.0612        |                 | 0.4501        | 0.0262        |                 |
| 2                                                                                              | 0.8969        | 0.0007        |                 | <b>0.0063</b> | <b>0.2932</b> | <b>Positive</b> |
| 3                                                                                              | 0.9952        | <0.0001       |                 | <b>0.0204</b> | <b>0.2211</b> | <b>Positive</b> |
| 4                                                                                              | <b>0.0370</b> | <b>0.1567</b> | <b>Positive</b> | 0.2719        | 0.0546        |                 |
| 5                                                                                              | <b>0.0200</b> | <b>0.1912</b> | <b>Negative</b> | 0.2998        | 0.0488        |                 |
| 6                                                                                              | 0.3355        | 0.3571        |                 | 0.8967        | 0.0008        |                 |
| 7                                                                                              | 0.7584        | 0.0037        |                 | 0.4335        | 0.0281        |                 |
| 8                                                                                              | 0.8566        | 0.0013        |                 | 0.9176        | 0.0110        |                 |
| 9                                                                                              | 0.3197        | 0.0381        |                 | 0.2697        | 0.0551        |                 |
| 10                                                                                             | 0.8102        | 0.0023        |                 | 0.9300        | 0.0004        |                 |
| 11                                                                                             | 0.1469        | 0.0792        |                 | 0.2420        | 0.0617        |                 |
| 12                                                                                             | <b>0.0010</b> | <b>0.3438</b> | <b>Positive</b> | 0.5225        | 0.0188        |                 |
| 13                                                                                             | <b>0.0084</b> | <b>0.2384</b> | <b>Positive</b> | 0.4009        | 0.0323        |                 |
| 14                                                                                             | 0.7562        | 0.0038        |                 | 0.7357        | 0.0053        |                 |
| 15                                                                                             | 0.6668        | 0.0072        |                 | <b>0.0452</b> | <b>0.1701</b> | <b>Positive</b> |
| 16                                                                                             | 0.8975        | 0.0170        |                 | 0.1390        | 0.0968        |                 |
| 17                                                                                             | 0.9893        | <0.0001       |                 | 0.7177        | 0.0061        |                 |
| 18                                                                                             | 0.2488        | 0.0508        |                 | 0.4269        | 0.0289        |                 |
| 19                                                                                             | 0.5714        | 0.0125        |                 | 0.2864        | 0.0515        |                 |
| 20                                                                                             | 0.3125        | 0.0392        |                 | <b>0.0001</b> | <b>0.4912</b> | <b>Positive</b> |
| 21                                                                                             | 0.8528        | 0.0013        |                 | 0.2597        | 0.0573        |                 |
| 22                                                                                             | <b>0.0037</b> | <b>0.2806</b> | <b>Positive</b> | 0.6608        | 0.0089        |                 |
| 23                                                                                             | 0.1742        | 0.0698        |                 | 0.8779        | 0.0011        |                 |
| 24                                                                                             | 0.4765        | 0.0197        |                 | 0.7583        | 0.0044        |                 |
| 25                                                                                             | 0.6538        | 0.0079        |                 | 0.7283        | 0.0056        |                 |
| 26                                                                                             | <b>0.0278</b> | <b>0.1728</b> | <b>Positive</b> | 0.4457        | 0.0267        |                 |
| 27                                                                                             | 0.4842        | 0.0190        |                 | 0.9214        | 0.0005        |                 |
| 28                                                                                             | 0.7328        | 0.0046        |                 | 0.2405        | 0.0621        |                 |
| 29                                                                                             | 0.3239        | 0.0374        |                 | 0.8939        | 0.0008        |                 |
| 30                                                                                             | 0.8615        | 0.0438        |                 | 0.5611        | 0.0156        |                 |
| 31                                                                                             | 0.2565        | 0.492         |                 | 0.0719        | 0.1398        |                 |
| 32                                                                                             | <b>0.0443</b> | <b>0.1466</b> | <b>Negative</b> | 0.7548        | 0.0045        |                 |
| 33                                                                                             | 0.2659        | 0.0474        |                 | 0.4943        | 0.0215        |                 |
| 34                                                                                             | <b>0.0248</b> | <b>0.1791</b> | <b>Negative</b> | 0.4319        | 0.0283        |                 |
| 35                                                                                             | <b>0.0277</b> | <b>0.1729</b> | <b>Positive</b> | 0.1347        | 0.0988        |                 |
| 36                                                                                             | 0.6023        | 0.0106        |                 | 0.5533        | 0.0162        |                 |
| 37                                                                                             | 0.1272        | 0.0872        |                 | 0.7676        | 0.0041        |                 |

Supplemental Table 3: Linear regression analyses of t-SNE populations and tumor volume at excision.

| Supplementary Table 4: Comparisons of TNF $\alpha$ -producing Cell Frequencies Among t-SNE Populations after Treatment with Checkpoint Blockade |            |                    |                                      |                                       |                                       |
|-------------------------------------------------------------------------------------------------------------------------------------------------|------------|--------------------|--------------------------------------|---------------------------------------|---------------------------------------|
| Population                                                                                                                                      | Time point | Iso Tx             | $\alpha$ -PD1                        | $\alpha$ -CTLA4                       | Combo                                 |
| 1                                                                                                                                               | Day 11     | 82.5 $\pm$ 11.81   | <b>24.06 <math>\pm</math> 11.77*</b> | <b>32.19 <math>\pm</math> 2.971**</b> | <b>38.04 <math>\pm</math> 4.571**</b> |
| 2                                                                                                                                               | Day 11     | 62.5 $\pm$ 23.94   | 45.84 $\pm$ 15.02                    | 43.75 $\pm$ 17.52                     | 28.88 $\pm$ 14.33                     |
| 2                                                                                                                                               | Day 21     | 63.28 $\pm$ 4.668  | 51.55 $\pm$ 10.21                    | 44.25 $\pm$ 10.83                     | 33.33 $\pm$ 20.41                     |
| 3                                                                                                                                               | Day 11     | 10.08 $\pm$ 2.381  | 11.22 $\pm$ 4.469                    | 10.4 $\pm$ 2.683                      | 10.37 $\pm$ 3.884                     |
| 3                                                                                                                                               | Day 21     | 17.95 $\pm$ 2.497  | 13.11 $\pm$ 5.518                    | 13.22 $\pm$ 2.89                      | 7.81 $\pm$ 4.959                      |
| 4                                                                                                                                               | Day 11     | 8.523 $\pm$ 3.17   | 14.75 $\pm$ 2.99                     | 14.99 $\pm$ 3.298                     | 9.616 $\pm$ 2.639                     |
| 4                                                                                                                                               | Day 21     | 15.45 $\pm$ 3.826  | 15.32 $\pm$ 5.896                    | 11.71 $\pm$ 4.324                     | 19.33 $\pm$ 10.73                     |
| 5                                                                                                                                               | Day 11     | 99.18 $\pm$ 0.2136 | 97.81 $\pm$ 0.4846                   | 97.43 $\pm$ 0.7083                    | <b>86.88 <math>\pm</math> 6.285**</b> |
| 5                                                                                                                                               | Day 21     | 78.55 $\pm$ 9.241  | 63.41 $\pm$ 10.83                    | 67.09 $\pm$ 14.23                     | 55.35 $\pm$ 21.1                      |
| 6                                                                                                                                               | Day 11     | 77.15 $\pm$ 4.4    | 63.24 $\pm$ 3.226                    | <b>53.46 <math>\pm</math> 3.578**</b> | <b>31.32 <math>\pm</math> 8.461**</b> |
| 8                                                                                                                                               | Day 11     | 12.84 $\pm$ 2.944  | <b>6.229 <math>\pm</math> 1.36*</b>  | 7.221 $\pm$ 1.448                     | <b>3.053 <math>\pm</math> 1.093**</b> |
| 9                                                                                                                                               | Day 11     | 7.65 $\pm$ 4.642   | 6.365 $\pm$ 3.524                    | 11.36 $\pm$ 2.418                     | 5.884 $\pm$ 3.805                     |
| 10                                                                                                                                              | Day 21     | 1.685 $\pm$ 0.5898 | 1.888 $\pm$ 0.9146                   | 4.116 $\pm$ 2.199                     | 1.605 $\pm$ 0.9431                    |
| 11                                                                                                                                              | Day 11     | 2.5 $\pm$ 2.50     | 2.636 $\pm$ 1.585                    | 0.5 $\pm$ 0.50                        | 4.909 $\pm$ 1.908                     |
| 12                                                                                                                                              | Day 21     | 94.73 $\pm$ 2.339  | 94.48 $\pm$ 1.722                    | <b>99.4 <math>\pm</math> 0.60**</b>   | 75 $\pm$ 25                           |
| 13                                                                                                                                              | Day 11     | 28.93 $\pm$ 4.03   | 34.51 $\pm$ 10.3                     | 46.09 $\pm$ 9.541                     | 27.54 $\pm$ 12                        |
| 13                                                                                                                                              | Day 21     | 10.46 $\pm$ 0.8996 | 6.594 $\pm$ 3.092                    | <b>2.176 <math>\pm</math> 1.088**</b> | <b>2.505 <math>\pm</math> 0.9513*</b> |
| 14                                                                                                                                              | Day 21     | 10.05 $\pm$ 7.919  | 10.99 $\pm$ 6.521                    | 4.234 $\pm$ 2.277                     | 2.273 $\pm$ 2.273                     |
| 15                                                                                                                                              | Day 11     | 95.18 $\pm$ 3.371  | 77.86 $\pm$ 8.405                    | 77.56 $\pm$ 8.266                     | <b>48.84 <math>\pm</math> 15.25*</b>  |
| 16                                                                                                                                              | Day 11     | 40.02 $\pm$ 12.03  | 32.39 $\pm$ 7.499                    | 31.11 $\pm$ 3.389                     | 14.87 $\pm$ 4.853                     |
| 17                                                                                                                                              | Day 21     | 37.05 $\pm$ 3.152  | 54.41 $\pm$ 6.128                    | 52.21 $\pm$ 8.23                      | 42.73 $\pm$ 13.05                     |
| 18                                                                                                                                              | Day 11     | 98.45 $\pm$ 1.55   | 99.56 $\pm$ 0.2903                   | 94.19 $\pm$ 2.994                     | 93.26 $\pm$ 6.185                     |
| 18                                                                                                                                              | Day 21     | 44.93 $\pm$ 17.7   | 67.48 $\pm$ 11.02                    | 37.5 $\pm$ 15.67                      | 81.25 $\pm$ 11.97                     |
| 19                                                                                                                                              | Day 11     | 21 $\pm$ 5.916     | 12.43 $\pm$ 2.676                    | 12.98 $\pm$ 4.024                     | <b>7.22 <math>\pm</math> 2.974*</b>   |
| 19                                                                                                                                              | Day 21     | 7.135 $\pm$ 0.9225 | 8.284 $\pm$ 2.976                    | 6.296 $\pm$ 1.522                     | 3.575 $\pm$ 3.575                     |
| 20                                                                                                                                              | Day 11     | 14.09 $\pm$ 7.649  | 8.061 $\pm$ 1.833                    | 10.34 $\pm$ 3.49                      | 6.724 $\pm$ 1.923                     |
| 20                                                                                                                                              | Day 21     | 44.9 $\pm$ 3.774   | 18.07 $\pm$ 6.586                    | <b>12.98 <math>\pm</math> 4.524**</b> | <b>8.533 <math>\pm</math> 6.081*</b>  |
| 24                                                                                                                                              | Day 21     | 21.58 $\pm$ 4.41   | 25.37 $\pm$ 6.351                    | <b>12.44 <math>\pm</math> 7.025*</b>  | 16.93 $\pm$ 5.733                     |
| 25                                                                                                                                              | Day 21     | 73.2 $\pm$ 5.361   | 43.05 $\pm$ 9.126                    | 60.28 $\pm$ 8.415                     | <b>28.33 <math>\pm</math> 6.453*</b>  |
| 26                                                                                                                                              | Day 21     | 92.75 $\pm$ 2.069  | 92.64 $\pm$ 0.8313                   | 90.21 $\pm$ 2.026                     | 88.13 $\pm$ 2.008                     |
| 27                                                                                                                                              | Day 21     | 78.45 $\pm$ 4.414  | 76.28 $\pm$ 3.918                    | 74.86 $\pm$ 5.37                      | 82.4 $\pm$ 3.848                      |
| 28                                                                                                                                              | Day 11     | 60.3 $\pm$ 7.355   | 67.33 $\pm$ 3.601                    | 65.19 $\pm$ 8.016                     | <b>34 <math>\pm</math> 7.255*</b>     |
| 28                                                                                                                                              | Day 21     | 41.4 $\pm$ 3.277   | 48.25 $\pm$ 4.438                    | 42.29 $\pm$ 4.881                     | 45.98 $\pm$ 12.39                     |
| 31                                                                                                                                              | Day 11     | 12.02 $\pm$ 1.705  | <b>6.711 <math>\pm</math> 1.123*</b> | <b>6.543 <math>\pm</math> 0.786*</b>  | <b>3.956 <math>\pm</math> 1.247**</b> |
| 31                                                                                                                                              | Day 21     | 1.27 $\pm$ 1.27    | 1.279 $\pm$ 0.5701                   | 1.729 $\pm$ 0.7084                    | 0.3625 $\pm$ 0.3625                   |
| 32                                                                                                                                              | Day 11     | 9.608 $\pm$ 3.05   | 5.888 $\pm$ 1.183                    | 6.268 $\pm$ 1.121                     | <b>3.686 <math>\pm</math> 0.6455*</b> |
| 34                                                                                                                                              | Day 11     | 11.82 $\pm$ 5.831  | 7.984 $\pm$ 1.455                    | 8.478 $\pm$ 2.369                     | 3.28 $\pm$ 1.072                      |
| 35                                                                                                                                              | Day 11     | 8.265 $\pm$ 1.866  | 4.878 $\pm$ 2.114                    | 4.458 $\pm$ 1.723                     | 10.42 $\pm$ 3.719                     |
| 35                                                                                                                                              | Day 21     | 3.113 $\pm$ 0.8758 | 2.633 $\pm$ 1.061                    | 4.948 $\pm$ 0.8484                    | 2.745 $\pm$ 1.416                     |
| 36                                                                                                                                              | Day 11     | 8.013 $\pm$ 1.009  | 4.581 $\pm$ 1.338                    | 3.751 $\pm$ 1.544                     | <b>3.736 <math>\pm</math> 0.6016*</b> |
| 36                                                                                                                                              | Day 21     | 1.235 $\pm$ 0.4726 | 2.164 $\pm$ 1.077                    | 1.989 $\pm$ 0.6741                    | 1.41 $\pm$ 0.7383                     |
| 37                                                                                                                                              | Day 11     | 6.35 $\pm$ 3.724   | 6.069 $\pm$ 1.34                     | 4.278 $\pm$ 1.438                     | 2.47 $\pm$ 0.5724                     |

**Supplemental Table 4. Comparison of the percentages of cells staining positive for TNF $\alpha$  among t-SNE Populations after checkpoint blockade.** Shown are group means plus/minus standard error. Asterisks and dagger symbols indicate a significant difference versus isotype control antibody-treated mice (Iso Tx) at Day 11 or Day 21 of MC38 tumor growth respectively by Mann-Whitney test. \*,  $p < 0.05$ ; \*\*,  $p < 0.01$ ; \*\*\*,  $p < 0.001$ . Note: Not all populations contained cells at both time points or across all treatments, and some populations did not have enough TNF $\alpha$ <sup>+</sup> cells to analyze.

| <b>Supplementary Table 5: Comparisons of TNF<math>\alpha</math> Median Fluorescent Intensities Among t-SNE Populations after Treatment with Checkpoint Blockade</b> |            |                   |                                      |                                     |                                      |
|---------------------------------------------------------------------------------------------------------------------------------------------------------------------|------------|-------------------|--------------------------------------|-------------------------------------|--------------------------------------|
| Population                                                                                                                                                          | Time point | Iso Tx            | $\alpha$ -PD1                        | $\alpha$ -CTLA4                     | Combo                                |
| 1                                                                                                                                                                   | Day 11     | 6041 $\pm$ 2609   | 3874 $\pm$ 864.4                     | <b>3189 <math>\pm</math> 516.7*</b> | <b>2455 <math>\pm</math> 214.7*</b>  |
| 2                                                                                                                                                                   | Day 11     | 17160 $\pm$ 1323  | 18550 $\pm$ 6921                     | 11850 $\pm$ 2326                    | 12270 $\pm$ 1811                     |
| 2                                                                                                                                                                   | Day 21     | 4949 $\pm$ 978.2  | 4957 $\pm$ 556.9                     | 4065 $\pm$ 407.6                    | 3618 $\pm$ 1425                      |
| 3                                                                                                                                                                   | Day 11     | 3685 $\pm$ 350.9  | 4412 $\pm$ 665.2                     | 3831 $\pm$ 767.6                    | 4413 $\pm$ 1233                      |
| 3                                                                                                                                                                   | Day 21     | 3858 $\pm$ 313.2  | 4310 $\pm$ 556.8                     | 3367 $\pm$ 179.5                    | 3199 $\pm$ 346                       |
| 4                                                                                                                                                                   | Day 11     | 9639 $\pm$ 2937   | <b>4202 <math>\pm</math> 653.8*</b>  | <b>4207 <math>\pm</math> 900.5*</b> | <b>3019 <math>\pm</math> 384.8**</b> |
| 4                                                                                                                                                                   | Day 21     | 3217 $\pm$ 351    | 2825 $\pm$ 447.2                     | 4527 $\pm$ 908.2                    | 7884 $\pm$ 4212                      |
| 5                                                                                                                                                                   | Day 11     | 16060 $\pm$ 1259  | 14500 $\pm$ 970.1                    | 14520 $\pm$ 890.4                   | <b>9688 <math>\pm</math> 974.6**</b> |
| 5                                                                                                                                                                   | Day 21     | 5702 $\pm$ 1386   | 5426 $\pm$ 1078                      | 5313 $\pm$ 1016                     | 3593 $\pm$ 783                       |
| 6                                                                                                                                                                   | Day 11     | 10680 $\pm$ 882.9 | <b>8038 <math>\pm</math> 347.1*</b>  | <b>6968 <math>\pm</math> 610.1*</b> | <b>5116 <math>\pm</math> 867.5**</b> |
| 7                                                                                                                                                                   | Day 11     | 39560 $\pm$ 8395  | 35710 $\pm$ 4394                     | 29760 $\pm$ 4056                    | 37900 $\pm$ 9447                     |
| 8                                                                                                                                                                   | Day 11     | 8058 $\pm$ 2317   | 4278 $\pm$ 1168                      | 3646 $\pm$ 591.8                    | 3358 $\pm$ 954.3                     |
| 12                                                                                                                                                                  | Day 21     | 60120 $\pm$ 2822  | 56820 $\pm$ 4757                     | <b>45600 <math>\pm</math> 6823*</b> | 46590 $\pm$ 5862                     |
| 13                                                                                                                                                                  | Day 11     | 15160 $\pm$ 2934  | 12280 $\pm$ 1147                     | 10410 $\pm$ 1744                    | 10260 $\pm$ 506.9                    |
| 13                                                                                                                                                                  | Day 21     | 7703 $\pm$ 2110   | 6707 $\pm$ 1710                      | 7848 $\pm$ 2472                     | 5382 $\pm$ 1179                      |
| 15                                                                                                                                                                  | Day 11     | 14750 $\pm$ 2158  | 17660 $\pm$ 3522                     | 16100 $\pm$ 4556                    | 10060 $\pm$ 2099                     |
| 16                                                                                                                                                                  | Day 11     | 6782 $\pm$ 1573   | 5480 $\pm$ 1000                      | 8138 $\pm$ 1251                     | 4758 $\pm$ 778.7                     |
| 17                                                                                                                                                                  | Day 21     | 13050 $\pm$ 1966  | 10090 $\pm$ 3269                     | 11300 $\pm$ 3071                    | 14810 $\pm$ 6294                     |
| 18                                                                                                                                                                  | Day 11     | 20830 $\pm$ 2861  | 20980 $\pm$ 1072                     | 19020 $\pm$ 391.3                   | 17550 $\pm$ 1372                     |
| 18                                                                                                                                                                  | Day 21     | 10650 $\pm$ 1634  | 13660 $\pm$ 6266                     | 16960 $\pm$ 7646                    | 10750 $\pm$ 4068                     |
| 19                                                                                                                                                                  | Day 11     | 9640 $\pm$ 3231   | 12620 $\pm$ 3717                     | 5561 $\pm$ 1307                     | 7479 $\pm$ 1666                      |
| 20                                                                                                                                                                  | Day 11     | 2482 $\pm$ 258.4  | 3533 $\pm$ 580                       | <b>4802 <math>\pm</math> 1057*</b>  | 4116 $\pm$ 828.4                     |
| 20                                                                                                                                                                  | Day 21     | 5033 $\pm$ 919.1  | 6327 $\pm$ 1986                      | 4836 $\pm$ 1384                     | 4100 $\pm$ 137.5                     |
| 23                                                                                                                                                                  | Day 11     | 40410 $\pm$ 4930  | 41550 $\pm$ 3239                     | 41230 $\pm$ 5415                    | 44810 $\pm$ 3584                     |
| 24                                                                                                                                                                  | Day 21     | 3938 $\pm$ 582.3  | 11100 $\pm$ 6499                     | 4188 $\pm$ 928.4                    | 12710 $\pm$ 5501                     |
| 25                                                                                                                                                                  | Day 21     | 4632 $\pm$ 540.7  | 4294 $\pm$ 440.9                     | 3912 $\pm$ 284.7                    | 3623 $\pm$ 764.5                     |
| 26                                                                                                                                                                  | Day 11     | 21410 $\pm$ 1950  | 22490 $\pm$ 648.6                    | 19900 $\pm$ 1495                    | 17660 $\pm$ 2082                     |
| 26                                                                                                                                                                  | Day 21     | 6462 $\pm$ 792    | 6263 $\pm$ 530.4                     | 4934 $\pm$ 546.3                    | 4673 $\pm$ 404.4                     |
| 27                                                                                                                                                                  | Day 11     | 10980 $\pm$ 2067  | 9371 $\pm$ 1696                      | 10800 $\pm$ 1207                    | 6903 $\pm$ 1006                      |
| 27                                                                                                                                                                  | Day 21     | 4232 $\pm$ 339.4  | 4777 $\pm$ 350                       | 4033 $\pm$ 277.4                    | 4291 $\pm$ 747.3                     |
| 28                                                                                                                                                                  | Day 11     | 12910 $\pm$ 3689  | 7371 $\pm$ 1687                      | 8840 $\pm$ 1830                     | 5118 $\pm$ 660.9                     |
| 28                                                                                                                                                                  | Day 21     | 8018 $\pm$ 560.6  | 5953 $\pm$ 812.8                     | 6338 $\pm$ 1012                     | 4938 $\pm$ 801                       |
| 31                                                                                                                                                                  | Day 11     | 3981 $\pm$ 423.5  | <b>2780 <math>\pm</math> 176.4*</b>  | 3118 $\pm$ 252.6                    | 2832 $\pm$ 473.2                     |
| 32                                                                                                                                                                  | Day 11     | 4164 $\pm$ 476.6  | <b>2810 <math>\pm</math> 126.9**</b> | 4530 $\pm$ 1708                     | <b>3141 <math>\pm</math> 357.6*</b>  |
| 34                                                                                                                                                                  | Day 11     | 5005 $\pm$ 556.3  | <b>3037 <math>\pm</math> 315.7*</b>  | 2932 $\pm$ 480.3                    | 3491 $\pm$ 490.9                     |
| 35                                                                                                                                                                  | Day 11     | 1988 $\pm$ 22.1   | 2300 $\pm$ 186.8                     | 2305 $\pm$ 317                      | 3098 $\pm$ 635.7                     |
| 35                                                                                                                                                                  | Day 21     | 2526 $\pm$ 554.6  | 3132 $\pm$ 626                       | 3046 $\pm$ 284.2                    | 2340 $\pm$ 302.6                     |
| 36                                                                                                                                                                  | Day 11     | 3980 $\pm$ 730.6  | <b>2277 <math>\pm</math> 134.4*</b>  | 3166 $\pm$ 463.3                    | 3050 $\pm$ 340.7                     |
| 36                                                                                                                                                                  | Day 21     | 2907 $\pm$ 693.5  | 3270 $\pm$ 394.3                     | 3334 $\pm$ 419.7                    | 2600 $\pm$ 40.59                     |
| 37                                                                                                                                                                  | Day 11     | 6345 $\pm$ 1974   | 4843 $\pm$ 1127                      | 3165 $\pm$ 426.3                    | 3338 $\pm$ 621.3                     |

**Supplemental Table 5. Comparison of TNF $\alpha$  median fluorescent intensities (MFI) among t-SNE Populations after treatment with checkpoint inhibitors checkpoint blockade.** Shown are group means plus/minus standard error. Asterisks and dagger symbols indicate a significant difference versus isotype control antibody-treated mice (Iso Tx) at Day 11 or Day 21 of MC38 tumor growth respectively by Mann-Whitney test. \*, p<0.05; \*\*, p<0.01; \*\*\*, p<0.001. Note: Not all populations contained cells at both time points or across all treatments, and some populations did not have enough TNF $\alpha$ <sup>+</sup> cells to analyze.

| <b>Supplementary Table 6: Comparisons of IFN-<math>\gamma</math>-producing Cell Frequencies Among t-SNE Populations after Treatment with Checkpoint Blockade</b> |            |                    |                                      |                                       |                                       |
|------------------------------------------------------------------------------------------------------------------------------------------------------------------|------------|--------------------|--------------------------------------|---------------------------------------|---------------------------------------|
| Population                                                                                                                                                       | Time point | Iso Tx             | $\alpha$ -PD1                        | $\alpha$ -CTLA4                       | Combo                                 |
| 1                                                                                                                                                                | Day 11     | 75 $\pm$ 18.93     | 44.11 $\pm$ 16.06                    | 69.09 $\pm$ 7.088                     | 59.18 $\pm$ 8.883                     |
| 2                                                                                                                                                                | Day 11     | 6.25 $\pm$ 6.25    | 6.25 $\pm$ 6.25                      | 7.638 $\pm$ 6.206                     | 16.06 $\pm$ 10.6                      |
| 2                                                                                                                                                                | Day 21     | 23.38 $\pm$ 5.563  | 16.78 $\pm$ 3.992                    | 18.73 $\pm$ 6.478                     | 6.25 $\pm$ 6.25                       |
| 3                                                                                                                                                                | Day 11     | 31.13 $\pm$ 4.611  | 29.48 $\pm$ 5.194                    | 43.95 $\pm$ 7.943                     | 54.25 $\pm$ 7.585                     |
| 3                                                                                                                                                                | Day 21     | 20.15 $\pm$ 1.189  | 14.79 $\pm$ 1.663                    | 22.31 $\pm$ 3.64                      | 16.09 $\pm$ 3.799                     |
| 4                                                                                                                                                                | Day 11     | 24.48 $\pm$ 5.37   | 20.85 $\pm$ 3.029                    | 39.79 $\pm$ 7.176                     | <b>51.56 <math>\pm</math> 6.392*</b>  |
| 4                                                                                                                                                                | Day 21     | 16.73 $\pm$ 2.219  | 11.48 $\pm$ 3.831                    | 13.78 $\pm$ 3.653                     | 19.33 $\pm$ 10.73                     |
| 5                                                                                                                                                                | Day 11     | 75.65 $\pm$ 6.325  | <b>57.94 <math>\pm</math> 4.851*</b> | 70.04 $\pm$ 4.541                     | 75.93 $\pm$ 5.748                     |
| 5                                                                                                                                                                | Day 21     | 73.35 $\pm$ 9.023  | 69.38 $\pm$ 11.15                    | 51.26 $\pm$ 12.26                     | 55.35 $\pm$ 21.1                      |
| 6                                                                                                                                                                | Day 11     | 59.08 $\pm$ 9.407  | 54.51 $\pm$ 4.918                    | 64.56 $\pm$ 5.75                      | 67.23 $\pm$ 5.883                     |
| 8                                                                                                                                                                | Day 11     | 2.918 $\pm$ 1.719  | 6.429 $\pm$ 2.052                    | 20.74 $\pm$ 6.546                     | <b>44.46 <math>\pm</math> 9.703**</b> |
| 9                                                                                                                                                                | Day 11     | 10.85 $\pm$ 5.365  | 6.419 $\pm$ 2.754                    | 17.09 $\pm$ 8.032                     | 19.59 $\pm$ 6.71                      |
| 10                                                                                                                                                               | Day 21     | 0.675 $\pm$ 0.675  | 0.0675 $\pm$ 0.0675                  | 0.625 $\pm$ 0.4126                    | 0.455 $\pm$ 0.455                     |
| 12                                                                                                                                                               | Day 21     | 96.9 $\pm$ 0.7627  | 96.98 $\pm$ 1.989                    | 98.15 $\pm$ 1.307                     | 98.33 $\pm$ 1.675                     |
| 13                                                                                                                                                               | Day 11     | 19.87 $\pm$ 4.653  | 35.25 $\pm$ 10.66                    | 45.42 $\pm$ 11.83                     | 26.43 $\pm$ 10.83                     |
| 13                                                                                                                                                               | Day 21     | 13.99 $\pm$ 2.314  | 9.101 $\pm$ 3.247                    | <b>3.485 <math>\pm</math> 1.163**</b> | 5.185 $\pm$ 3.117                     |
| 14                                                                                                                                                               | Day 11     | 45.25 $\pm$ 23.21  | 41.08 $\pm$ 14.83                    | 37.8 $\pm$ 15.16                      | 39.39 $\pm$ 13.62                     |
| 14                                                                                                                                                               | Day 21     | 17.48 $\pm$ 7.487  | 28.79 $\pm$ 5.475                    | <b>59.45 <math>\pm</math> 11.43*</b>  | 59.1 $\pm$ 24.75                      |
| 15                                                                                                                                                               | Day 11     | 46.53 $\pm$ 19.02  | 19.14 $\pm$ 4.548                    | 35.33 $\pm$ 6.969                     | 54.59 $\pm$ 11.88                     |
| 16                                                                                                                                                               | Day 11     | 57.33 $\pm$ 5.132  | 59.23 $\pm$ 8.41                     | 65.76 $\pm$ 9.285                     | 60.4 $\pm$ 10.14                      |
| 16                                                                                                                                                               | Day 21     | 53.63 $\pm$ 10.22  | 26.95 $\pm$ 9.101                    | <b>20.79 <math>\pm</math> 7.835*</b>  | <b>8.35 <math>\pm</math> 4.821*</b>   |
| 17                                                                                                                                                               | Day 21     | 78.45 $\pm$ 6.478  | 80.95 $\pm$ 2.019                    | 92.74 $\pm$ 2.766                     | 81.05 $\pm$ 2.602                     |
| 18                                                                                                                                                               | Day 11     | 92.13 $\pm$ 4.256  | 87.51 $\pm$ 4.44                     | 91.1 $\pm$ 2.897                      | 76.96 $\pm$ 12.7                      |
| 19                                                                                                                                                               | Day 11     | 12.22 $\pm$ 5.203  | 14.15 $\pm$ 2.872                    | <b>36.35 <math>\pm</math> 6.949*</b>  | 49.33 $\pm$ 12.25                     |
| 19                                                                                                                                                               | Day 21     | 12.69 $\pm$ 4.261  | 11.55 $\pm$ 3.532                    | 7.781 $\pm$ 2.015                     | 7.06 $\pm$ 4.973                      |
| 20                                                                                                                                                               | Day 11     | 29.9 $\pm$ 7.788   | 26.71 $\pm$ 2.26                     | 43.23 $\pm$ 5.382                     | 45.65 $\pm$ 8.916                     |
| 20                                                                                                                                                               | Day 21     | 79.23 $\pm$ 1.867  | 46.54 $\pm$ 12.24                    | <b>29.31 <math>\pm</math> 5.401**</b> | <b>14.27 <math>\pm</math> 7.552*</b>  |
| 23                                                                                                                                                               | Day 11     | 70.98 $\pm$ 13.97  | 57.86 $\pm$ 5.771                    | 75.44 $\pm$ 7.143                     | 69.51 $\pm$ 11.73                     |
| 24                                                                                                                                                               | Day 21     | 50.3 $\pm$ 3.097   | <b>70.79 <math>\pm</math> 7.481*</b> | 51.91 $\pm$ 9.312                     | 50.58 $\pm$ 20.42                     |
| 25                                                                                                                                                               | Day 21     | 53.68 $\pm$ 9.69   | 49.23 $\pm$ 7.684                    | 52.96 $\pm$ 7.805                     | 34 $\pm$ 14.47                        |
| 26                                                                                                                                                               | Day 11     | 63.63 $\pm$ 9.155  | 61.9 $\pm$ 8.54                      | 59.75 $\pm$ 11.79                     | 27.15 $\pm$ 10.95                     |
| 26                                                                                                                                                               | Day 21     | 87.08 $\pm$ 3.759  | 75.53 $\pm$ 5.713                    | 73.2 $\pm$ 4.36                       | 70.18 $\pm$ 11.32                     |
| 27                                                                                                                                                               | Day 11     | 72.75 $\pm$ 9.795  | 81.25 $\pm$ 6.632                    | 68 $\pm$ 6.118                        | 74.6 $\pm$ 11.93                      |
| 27                                                                                                                                                               | Day 21     | 91.85 $\pm$ 0.4113 | 91.6 $\pm$ 2.022                     | <b>82.2 <math>\pm</math> 6.075*</b>   | 93.83 $\pm$ 2.222                     |
| 28                                                                                                                                                               | Day 11     | 62.93 $\pm$ 5.289  | 61.56 $\pm$ 8.53                     | 70.35 $\pm$ 7.609                     | 68.75 $\pm$ 11.77                     |
| 28                                                                                                                                                               | Day 21     | 70.7 $\pm$ 4.009   | 72.99 $\pm$ 2.905                    | 77.43 $\pm$ 4.523                     | 71.6 $\pm$ 7.929                      |
| 29                                                                                                                                                               | Day 21     | 8.325 $\pm$ 8.325  | 17.56 $\pm$ 6.316                    | 15.63 $\pm$ 12.44                     | 25 $\pm$ 25                           |
| 30                                                                                                                                                               | Day 11     | 50 $\pm$ 28.87     | 18.75 $\pm$ 13.15                    | 62.5 $\pm$ 18.3                       | 18.75 $\pm$ 13.15                     |
| 30                                                                                                                                                               | Day 21     | 45.83 $\pm$ 20.84  | 59.94 $\pm$ 12.93                    | 55.55 $\pm$ 13.77                     | 25 $\pm$ 25                           |
| 31                                                                                                                                                               | Day 11     | 8.93 $\pm$ 2.666   | 14.26 $\pm$ 3.09                     | <b>29.05 <math>\pm</math> 7.616*</b>  | <b>44.51 <math>\pm</math> 5.531**</b> |
| 31                                                                                                                                                               | Day 21     | 1.94 $\pm$ 1.027   | 1.991 $\pm$ 0.7307                   | 2.891 $\pm$ 0.8262                    | 4.44 $\pm$ 2.612                      |
| 32                                                                                                                                                               | Day 11     | 9.815 $\pm$ 1.695  | 13.82 $\pm$ 3.305                    | <b>31.01 <math>\pm</math> 7.32*</b>   | <b>45.98 <math>\pm</math> 5.679**</b> |
| 32                                                                                                                                                               | Day 21     | 7.043 $\pm$ 3.105  | 1.539 $\pm$ 0.8301                   | 12.23 $\pm$ 2.487                     | 15.89 $\pm$ 11.49                     |
| 34                                                                                                                                                               | Day 11     | 10.19 $\pm$ 5.298  | 7.546 $\pm$ 2.251                    | 26.33 $\pm$ 8.606                     | <b>47.28 <math>\pm</math> 6.361**</b> |
| 35                                                                                                                                                               | Day 11     | 17.6 $\pm$ 1.439   | 13.65 $\pm$ 4.392                    | <b>26.77 <math>\pm</math> 9.114*</b>  | <b>38.55 <math>\pm</math> 7.338**</b> |
| 35                                                                                                                                                               | Day 21     | 3.718 $\pm$ 0.5425 | 4.945 $\pm$ 0.9764                   | 5.065 $\pm$ 1.13                      | 7.708 $\pm$ 2.308                     |
| 36                                                                                                                                                               | Day 11     | 7.935 $\pm$ 3.859  | 12.35 $\pm$ 4.265                    | 29.48 $\pm$ 6.779                     | <b>42.39 <math>\pm</math> 6.818**</b> |
| 36                                                                                                                                                               | Day 21     | 5.955 $\pm$ 0.4786 | 5.423 $\pm$ 0.8202                   | 5.905 $\pm$ 0.9849                    | 5.408 $\pm$ 0.7515                    |
| 37                                                                                                                                                               | Day 11     | 11.73 $\pm$ 5.44   | 20.75 $\pm$ 3.813                    | 34.58 $\pm$ 8.221                     | <b>42.24 <math>\pm</math> 5.672**</b> |

**Supplemental Table 6. Comparison of the percentages of cells staining positive for IFN- $\gamma$  among t-SNE Populations after checkpoint blockade.** Shown are group means plus/minus standard error. Asterisks and dagger symbols indicate a significant difference versus isotype control antibody-treated mice (Iso

Tx) at Day 11 or Day 21 of MC38 tumor growth respectively by Mann-Whitney test. \*,  $p < 0.05$ ; \*\*,  $p < 0.01$ ; \*\*\*,  $p < 0.001$ . Note: Not all populations contained cells at both time points or across all treatments, and some populations did not have enough IFN- $\gamma^+$  cells to analyze.

| <b>Table 7: Comparisons of IFN-<math>\gamma</math> Median Fluorescent Intensities Among t-SNE Populations after Treatment with Checkpoint Blockade</b> |            |                   |                                       |                                       |                                      |
|--------------------------------------------------------------------------------------------------------------------------------------------------------|------------|-------------------|---------------------------------------|---------------------------------------|--------------------------------------|
| Population                                                                                                                                             | Time point | Iso Tx            | $\alpha$ -PD1                         | $\alpha$ -CTLA4                       | Combo                                |
| 1                                                                                                                                                      | Day 11     | 747.3 $\pm$ 93.07 | 467 $\pm$ 68.11                       | 561.4 $\pm$ 63.51                     | 615.5 $\pm$ 27.11                    |
| 3                                                                                                                                                      | Day 11     | 461.5 $\pm$ 61.65 | 420 $\pm$ 33.86                       | 418 $\pm$ 38.07                       | 391.6 $\pm$ 34.14                    |
| 3                                                                                                                                                      | Day 21     | 326.3 $\pm$ 5.17  | 380.3 $\pm$ 26.99                     | 443.5 $\pm$ 50.65                     | <b>409.3 <math>\pm</math> 31.12*</b> |
| 4                                                                                                                                                      | Day 11     | 424.3 $\pm$ 46.69 | 389.8 $\pm$ 31.34                     | 398.4 $\pm$ 8.99                      | 369.5 $\pm$ 18.13                    |
| 4                                                                                                                                                      | Day 21     | 336 $\pm$ 23.71   | 388.4 $\pm$ 65.59                     | 376.6 $\pm$ 26.58                     | 447.3 $\pm$ 170.5                    |
| 5                                                                                                                                                      | Day 11     | 571 $\pm$ 32.28   | 489.3 $\pm$ 30.06                     | 568.4 $\pm$ 80.65                     | 581.3 $\pm$ 45.16                    |
| 5                                                                                                                                                      | Day 21     | 586 $\pm$ 171.1   | 590.7 $\pm$ 53.75                     | 483.3 $\pm$ 51.72                     | 450.7 $\pm$ 79                       |
| 6                                                                                                                                                      | Day 11     | 395 $\pm$ 23.62   | 420.6 $\pm$ 21.95                     | 501.3 $\pm$ 79.01                     | 494.4 $\pm$ 42.72                    |
| 8                                                                                                                                                      | Day 11     | 332.5 $\pm$ 79.5  | 337.7 $\pm$ 49.24                     | 308.7 $\pm$ 25.34                     | 327.9 $\pm$ 7.453                    |
| 9                                                                                                                                                      | Day 11     | 343 $\pm$ 85.5    | 396 $\pm$ 87.27                       | 308.5 $\pm$ 19.73                     | 362.7 $\pm$ 21.21                    |
| 12                                                                                                                                                     | Day 21     | 1464 $\pm$ 50.19  | 1190 $\pm$ 155.8                      | <b>850.5 <math>\pm</math> 99.81**</b> | <b>780.5 <math>\pm</math> 201.8*</b> |
| 13                                                                                                                                                     | Day 11     | 552 $\pm$ 151.5   | 941.1 $\pm$ 384.4                     | 484.6 $\pm$ 93.43                     | 655.3 $\pm$ 146.6                    |
| 14                                                                                                                                                     | Day 11     | 388.3 $\pm$ 68.2  | 428.2 $\pm$ 91.91                     | 581.5 $\pm$ 147.9                     | 594.4 $\pm$ 108                      |
| 14                                                                                                                                                     | Day 21     | 409.7 $\pm$ 101.6 | 447.4 $\pm$ 85.43                     | 388 $\pm$ 27.59                       | 359.7 $\pm$ 66.12                    |
| 15                                                                                                                                                     | Day 11     | 635.3 $\pm$ 304.9 | 406.1 $\pm$ 19.82                     | 501 $\pm$ 54.3                        | 436.3 $\pm$ 20.16                    |
| 16                                                                                                                                                     | Day 11     | 735.8 $\pm$ 219.6 | 1100 $\pm$ 238.1                      | 967.5 $\pm$ 129.7                     | 1293 $\pm$ 362.8                     |
| 16                                                                                                                                                     | Day 21     | 777 $\pm$ 138.7   | 759.4 $\pm$ 111.3                     | 586.6 $\pm$ 107.6                     | 590 $\pm$ 220                        |
| 17                                                                                                                                                     | Day 21     | 536 $\pm$ 40.81   | 531.4 $\pm$ 61.65                     | <b>658.9 <math>\pm</math> 32.42*</b>  | 566 $\pm$ 103.6                      |
| 18                                                                                                                                                     | Day 11     | 711.8 $\pm$ 87    | 640.9 $\pm$ 52.58                     | 774.6 $\pm$ 90.67                     | 817 $\pm$ 104                        |
| 18                                                                                                                                                     | Day 21     | 701.3 $\pm$ 76.14 | 879.1 $\pm$ 147.3                     | 723.5 $\pm$ 179.9                     | 583.3 $\pm$ 73.9                     |
| 19                                                                                                                                                     | Day 11     | 345.7 $\pm$ 56.33 | 599.1 $\pm$ 184.8                     | 524 $\pm$ 132.7                       | 429.1 $\pm$ 28.67                    |
| 19                                                                                                                                                     | Day 21     | 515.8 $\pm$ 109.8 | 607.3 $\pm$ 138.6                     | 356.5 $\pm$ 30.65                     | 390 $\pm$ 144                        |
| 20                                                                                                                                                     | Day 11     | 729.5 $\pm$ 304.7 | 918 $\pm$ 290                         | 443.4 $\pm$ 17.15                     | 447.8 $\pm$ 34.86                    |
| 20                                                                                                                                                     | Day 21     | 697.5 $\pm$ 60.21 | 624.9 $\pm$ 77.68                     | <b>397.4 <math>\pm</math> 30.31**</b> | 448.3 $\pm$ 46.48                    |
| 23                                                                                                                                                     | Day 11     | 517.5 $\pm$ 102.4 | 677 $\pm$ 52.18                       | 771.5 $\pm$ 69.23                     | 786.4 $\pm$ 73.27                    |
| 24                                                                                                                                                     | Day 21     | 388.8 $\pm$ 24.7  | 429 $\pm$ 53.21                       | 426.6 $\pm$ 44.47                     | 419 $\pm$ 91.76                      |
| 25                                                                                                                                                     | Day 21     | 402.8 $\pm$ 16.84 | 420 $\pm$ 20.2                        | 362.6 $\pm$ 16.01                     | 350.7 $\pm$ 42.53                    |
| 26                                                                                                                                                     | Day 11     | 551.5 $\pm$ 50.07 | 461.4 $\pm$ 69.54                     | 450.1 $\pm$ 77.38                     | 618.5 $\pm$ 95.96                    |
| 26                                                                                                                                                     | Day 21     | 473.3 $\pm$ 25.98 | 426.4 $\pm$ 20.11                     | <b>391.1 <math>\pm</math> 20.03*</b>  | 411.8 $\pm$ 45.48                    |
| 27                                                                                                                                                     | Day 11     | 485.5 $\pm$ 56.87 | 538.6 $\pm$ 61.08                     | 513.3 $\pm$ 75.2                      | 663.4 $\pm$ 79.62                    |
| 27                                                                                                                                                     | Day 21     | 550.8 $\pm$ 23.24 | 495.1 $\pm$ 25.63                     | <b>463 <math>\pm</math> 15.1*</b>     | 464 $\pm$ 43.13                      |
| 28                                                                                                                                                     | Day 11     | 455.5 $\pm$ 33.57 | 426.6 $\pm$ 56.56                     | 560.3 $\pm$ 61.63                     | <b>686.6 <math>\pm</math> 77.46*</b> |
| 28                                                                                                                                                     | Day 21     | 492 $\pm$ 30.02   | 532.3 $\pm$ 43.51                     | 541.3 $\pm$ 104.4                     | 488.8 $\pm$ 43.44                    |
| 30                                                                                                                                                     | Day 11     | 385.5 $\pm$ 63.5  | 434 $\pm$ 167                         | 684.8 $\pm$ 164.8                     | 555.5 $\pm$ 42.5                     |
| 31                                                                                                                                                     | Day 11     | 283.5 $\pm$ 10.04 | <b>440.4 <math>\pm</math> 22.63**</b> | <b>360.3 <math>\pm</math> 15.6**</b>  | <b>348.5 <math>\pm</math> 13.44*</b> |
| 31                                                                                                                                                     | Day 21     | 439.3 $\pm$ 78.23 | 292 $\pm$ 17.36                       | 525.2 $\pm$ 179.6                     | 277.3 $\pm$ 21.4                     |
| 32                                                                                                                                                     | Day 11     | 394.5 $\pm$ 49.64 | 364.5 $\pm$ 16.38                     | 367 $\pm$ 21.05                       | 354.4 $\pm$ 8.627                    |
| 32                                                                                                                                                     | Day 21     | 248.7 $\pm$ 5.175 | 340 $\pm$ 45.8                        | 318.9 $\pm$ 28.58                     | 675.3 $\pm$ 59.6                     |
| 34                                                                                                                                                     | Day 11     | 608.7 $\pm$ 220.4 | 398.9 $\pm$ 40.06                     | 375.1 $\pm$ 19.81                     | 370 $\pm$ 11.48                      |
| 35                                                                                                                                                     | Day 11     | 334.3 $\pm$ 36.17 | 408.8 $\pm$ 27.41                     | 594.8 $\pm$ 249.8                     | 559.1 $\pm$ 152.3                    |
| 35                                                                                                                                                     | Day 21     | 408.8 $\pm$ 56.06 | 604.6 $\pm$ 223.5                     | 385 $\pm$ 62.76                       | 429 $\pm$ 51.3                       |
| 36                                                                                                                                                     | Day 11     | 295 $\pm$ 20.84   | 343.7 $\pm$ 21.71                     | 312.6 $\pm$ 14.01                     | <b>436.5 <math>\pm</math> 93.2*</b>  |
| 36                                                                                                                                                     | Day 21     | 280 $\pm$ 7.948   | <b>360.1 <math>\pm</math> 13.56**</b> | <b>339 <math>\pm</math> 14.9*</b>     | <b>412.3 <math>\pm</math> 47.53*</b> |
| 37                                                                                                                                                     | Day 11     | 355.5 $\pm$ 64.4  | 359.9 $\pm$ 23.63                     | 324.3 $\pm$ 17.4                      | 328.8 $\pm$ 12.03                    |

**Supplemental Table 7. Comparison of IFN- $\gamma$  median fluorescent intensities (MFI) among t-SNE Populations after treatment with checkpoint blockade.** Shown are group means plus/minus standard error. Asterisks and dagger symbols indicate a significant difference versus isotype control antibody-treated mice (Iso Tx) at Day 11 or Day 21 of MC38 tumor growth respectively by Mann-Whitney test. \*,  $p < 0.05$ ; \*\*,  $p < 0.01$ ; \*\*\*,  $p < 0.001$ . Note: Not all populations contained cells at both time points or across all treatments, and some populations did not have enough IFN- $\gamma$ <sup>+</sup> cells to analyze.

| <b>Table 8: Comparisons of Cell-surface CD107a-expressing Cell Frequencies Among t-SNE Populations after Treatment with Checkpoint Blockade</b> |            |                     |                     |                                      |                                      |
|-------------------------------------------------------------------------------------------------------------------------------------------------|------------|---------------------|---------------------|--------------------------------------|--------------------------------------|
| Population                                                                                                                                      | Time point | Iso Tx              | $\alpha$ -PD1       | $\alpha$ -CTLA4                      | Combo                                |
| 1                                                                                                                                               | Day 11     | 97.5 $\pm$ 2.5      | 73.78 $\pm$ 11.78   | <b>85.86 <math>\pm</math> 2.598*</b> | <b>85.86 <math>\pm</math> 2.101*</b> |
| 3                                                                                                                                               | Day 21     | 0.2875 $\pm$ 0.1058 | 0.6818 $\pm$ 0.3231 | 0.36 $\pm$ 0.1533                    | 0.535 $\pm$ 0.3993                   |
| 5                                                                                                                                               | Day 11     | 83.8 $\pm$ 1.536    | 86.26 $\pm$ 1.475   | <b>89.13 <math>\pm</math> 1.201*</b> | 90.34 $\pm$ 3.272                    |
| 5                                                                                                                                               | Day 21     | 85.83 $\pm$ 9.466   | 75.05 $\pm$ 11.84   | 74.18 $\pm$ 12.31                    | 61.6 $\pm$ 21.5                      |
| 6                                                                                                                                               | Day 11     | 82.35 $\pm$ 3.003   | 83.93 $\pm$ 3.087   | 82.44 $\pm$ 2.836                    | 62.81 $\pm$ 6.592                    |
| 12                                                                                                                                              | Day 21     | 54.2 $\pm$ 6.079    | 41.76 $\pm$ 9.074   | 73.16 $\pm$ 6.865                    | 48.45 $\pm$ 18                       |
| 13                                                                                                                                              | Day 21     | 12.37 $\pm$ 2.975   | 8.748 $\pm$ 3.418   | 7.189 $\pm$ 2.657                    | <b>2.315 <math>\pm</math> 1.337*</b> |
| 16                                                                                                                                              | Day 11     | 30.48 $\pm$ 7.681   | 29.08 $\pm$ 6.863   | 19.27 $\pm$ 4.82                     | 35.01 $\pm$ 10.59                    |
| 16                                                                                                                                              | Day 21     | 47.5 $\pm$ 5.907    | 16.39 $\pm$ 5.81    | <b>18.6 <math>\pm</math> 5.573*</b>  | <b>16.68 <math>\pm</math> 11.79*</b> |
| 17                                                                                                                                              | Day 21     | 72.73 $\pm$ 5.263   | 64.69 $\pm$ 4.446   | 88.19 $\pm$ 4.253                    | 69.58 $\pm$ 6.647                    |
| 18                                                                                                                                              | Day 11     | 49.2 $\pm$ 3.848    | 52.09 $\pm$ 6.006   | 64.59 $\pm$ 6.9                      | 60.83 $\pm$ 10.07                    |
| 19                                                                                                                                              | Day 11     | 1.725 $\pm$ 0.9971  | 3.056 $\pm$ 1.37    | 8.176 $\pm$ 3.996                    | 3.525 $\pm$ 1.243                    |
| 19                                                                                                                                              | Day 21     | 16.57 $\pm$ 4.438   | 9.416 $\pm$ 3.566   | 7.498 $\pm$ 2.454                    | 2.273 $\pm$ 2.273                    |
| 20                                                                                                                                              | Day 11     | 5.318 $\pm$ 1.037   | 7.68 $\pm$ 2.065    | 8.778 $\pm$ 1.747                    | 7.713 $\pm$ 2.343                    |
| 20                                                                                                                                              | Day 21     | 13.68 $\pm$ 1.27    | 26.89 $\pm$ 10.69   | 21.73 $\pm$ 5.847                    | 16.02 $\pm$ 3.612                    |
| 23                                                                                                                                              | Day 11     | 49.15 $\pm$ 17.31   | 61.65 $\pm$ 5.508   | 62.59 $\pm$ 4.296                    | 68.29 $\pm$ 11.37                    |
| 24                                                                                                                                              | Day 21     | 98.38 $\pm$ 0.956   | 97.48 $\pm$ 1.352   | 97.45 $\pm$ 2.493                    | 98.88 $\pm$ 1.125                    |
| 25                                                                                                                                              | Day 21     | 99.28 $\pm$ 0.725   | 85.05 $\pm$ 12.17   | 98.56 $\pm$ 0.6333                   | 95.25 $\pm$ 2.056                    |
| 26                                                                                                                                              | Day 11     | 61.73 $\pm$ 12.68   | 60.4 $\pm$ 11.01    | 59.14 $\pm$ 13.79                    | 31.78 $\pm$ 12.7                     |
| 26                                                                                                                                              | Day 21     | 98.48 $\pm$ 0.34    | 98.35 $\pm$ 0.3322  | 98.95 $\pm$ 0.2104                   | 99.55 $\pm$ 0.2872                   |
| 27                                                                                                                                              | Day 11     | 57.1 $\pm$ 14.81    | 52.04 $\pm$ 12.43   | 69.56 $\pm$ 2.216                    | 59.86 $\pm$ 14.5                     |
| 27                                                                                                                                              | Day 21     | 90.38 $\pm$ 2.512   | 91.24 $\pm$ 1.997   | 96.2 $\pm$ 1.085                     | 93.83 $\pm$ 2.752                    |
| 28                                                                                                                                              | Day 11     | 51.45 $\pm$ 9.797   | 38.76 $\pm$ 7.448   | 48.78 $\pm$ 11.09                    | 57.05 $\pm$ 10.87                    |
| 28                                                                                                                                              | Day 21     | 74.9 $\pm$ 6.161    | 67.26 $\pm$ 5.775   | 64.39 $\pm$ 7.383                    | 69.15 $\pm$ 10.45                    |
| 30                                                                                                                                              | Day 21     | 45.83 $\pm$ 20.84   | 31.19 $\pm$ 13.35   | 42.93 $\pm$ 13.42                    | 25 $\pm$ 25                          |

**Supplemental Table 8. Comparison of the percentages of cells staining positive for cell-surface CD107a among t-SNE Populations after treatment with checkpoint blockade.** Shown are group means plus/minus standard error. Asterisks and dagger symbols indicate a significant difference versus isotype control antibody-treated mice (Iso Tx) at Day 11 or Day 21 of MC38 tumor growth respectively by Mann-Whitney test. \*,  $p < 0.05$ ; \*\*,  $p < 0.01$ ; \*\*\*,  $p < 0.001$ . Note: Not all populations contained cells at both time points or across all treatments, and some populations did not have enough cell-surface CD107a<sup>+</sup> cells to analyze.



| <b>Table 9: Comparisons of cell-surface CD107a Median Fluorescent Intensities Among t-SNE Populations after Treatment with Checkpoint Blockade</b> |            |                   |                                      |                                      |                                      |
|----------------------------------------------------------------------------------------------------------------------------------------------------|------------|-------------------|--------------------------------------|--------------------------------------|--------------------------------------|
| Population                                                                                                                                         | Time point | Iso Tx            | $\alpha$ -PD1                        | $\alpha$ -CTLA4                      | Combo                                |
| 1                                                                                                                                                  | Day 11     | 1469 $\pm$ 278.8  | 1909 $\pm$ 108.8                     | <b>2073 <math>\pm</math> 145.6*</b>  | 1943 $\pm$ 139.4                     |
| 3                                                                                                                                                  | Day 21     | 753.7 $\pm$ 56.53 | 776.1 $\pm$ 44.91                    | 1453 $\pm$ 534                       | 671.5 $\pm$ 39.5                     |
| 5                                                                                                                                                  | Day 11     | 1895 $\pm$ 78.56  | <b>2220 <math>\pm</math> 68.75**</b> | <b>2264 <math>\pm</math> 72.73*</b>  | <b>3036 <math>\pm</math> 485.8*</b>  |
| 5                                                                                                                                                  | Day 21     | 3163 $\pm$ 790.3  | 2076 $\pm$ 336.9                     | 2199 $\pm$ 346.9                     | 3822 $\pm$ 881.4                     |
| 6                                                                                                                                                  | Day 11     | 3127 $\pm$ 438    | 3759 $\pm$ 176.2                     | 3652 $\pm$ 231.2                     | 2762 $\pm$ 533.3                     |
| 12                                                                                                                                                 | Day 21     | 1231 $\pm$ 71.66  | 1338 $\pm$ 208.8                     | <b>1798 <math>\pm</math> 146.8**</b> | 1261 $\pm$ 346                       |
| 16                                                                                                                                                 | Day 11     | 1704 $\pm$ 422.8  | 1795 $\pm$ 354.8                     | 1478 $\pm$ 286.2                     | 1681 $\pm$ 342.5                     |
| 16                                                                                                                                                 | Day 21     | 1401 $\pm$ 386.5  | 1073 $\pm$ 103.2                     | 1348 $\pm$ 351.5                     | 1334 $\pm$ 329                       |
| 17                                                                                                                                                 | Day 21     | 1269 $\pm$ 122    | 1351 $\pm$ 192.5                     | 1988 $\pm$ 268.6                     | 1664 $\pm$ 537.3                     |
| 18                                                                                                                                                 | Day 11     | 1190 $\pm$ 143.4  | 1565 $\pm$ 188.7                     | 1855 $\pm$ 325.3                     | <b>2423 <math>\pm</math> 580.8**</b> |
| 18                                                                                                                                                 | Day 21     | 2310 $\pm$ 841.9  | 2111 $\pm$ 314.6                     | 3657 $\pm$ 1777                      | 3031 $\pm$ 1187                      |
| 20                                                                                                                                                 | Day 11     | 892.3 $\pm$ 170.8 | 1535 $\pm$ 716.6                     | 1375 $\pm$ 271                       | 1318 $\pm$ 110.2                     |
| 20                                                                                                                                                 | Day 21     | 767.8 $\pm$ 38.53 | 1296 $\pm$ 283                       | 1120 $\pm$ 122.4                     | <b>1856 <math>\pm</math> 472.9*</b>  |
| 23                                                                                                                                                 | Day 11     | 1248 $\pm$ 144.1  | 1758 $\pm$ 166.3                     | 1795 $\pm$ 266.4                     | <b>2179 <math>\pm</math> 194.5*</b>  |
| 24                                                                                                                                                 | Day 21     | 3691 $\pm$ 269.2  | 2868 $\pm$ 473                       | 4167 $\pm$ 458.7                     | 2779 $\pm$ 544.2                     |
| 25                                                                                                                                                 | Day 21     | 3156 $\pm$ 174.8  | 2751 $\pm$ 113.6                     | 2829 $\pm$ 251.2                     | 2382 $\pm$ 319.1                     |
| 26                                                                                                                                                 | Day 11     | 1780 $\pm$ 282.1  | 1796 $\pm$ 461.8                     | 2049 $\pm$ 712.3                     | 1414 $\pm$ 474.4                     |
| 26                                                                                                                                                 | Day 21     | 2255 $\pm$ 147.4  | 2362 $\pm$ 228.3                     | 2330 $\pm$ 121.7                     | <b>2944 <math>\pm</math> 303.1*</b>  |
| 27                                                                                                                                                 | Day 11     | 1125 $\pm$ 165.7  | 1167 $\pm$ 133.6                     | <b>2688 <math>\pm</math> 734.2*</b>  | <b>2673 <math>\pm</math> 777.6*</b>  |
| 27                                                                                                                                                 | Day 21     | 1704 $\pm$ 27.82  | 1843 $\pm$ 108.8                     | 1758 $\pm$ 83.18                     | 1992 $\pm$ 246.1                     |
| 28                                                                                                                                                 | Day 11     | 2929 $\pm$ 940.5  | 1861 $\pm$ 315.5                     | 2409 $\pm$ 954.4                     | 2126 $\pm$ 354.5                     |
| 28                                                                                                                                                 | Day 21     | 1635 $\pm$ 115.7  | 1481 $\pm$ 128.4                     | 2038 $\pm$ 252.2                     | 1097 $\pm$ 207.1                     |

**Supplemental Table 9. Comparison of cell-surface CD107a median fluorescent intensities (MFI) among t-SNE Populations after treatment with checkpoint blockade.** Shown are group means plus/minus standard error. Asterisks and dagger symbols indicate a significant difference versus isotype control antibody-treated mice (Iso Tx) at Day 11 or Day 21 of MC38 tumor growth respectively by Mann-Whitney test. \*,  $p < 0.05$ ; \*\*,  $p < 0.01$ ; \*\*\*,  $p < 0.001$ . Note: Not all populations contained cells at both time points or across all treatments, and some populations did not have enough cell-surface CD107a<sup>+</sup> cells to analyze.
